# Supplementary material for: Bread Wheat (Triticum aestivum L.) Grain Protein Concentration Is Related to Early Post-Flowering Nitrate Uptake under Putative Control of Plant Satiety Level
Source: PubMed Central journal article supplement (PMC4757577; doi:10.1371/journal.pone.0149668), 2016-02-17
Supplement: pone.0149668.s007.pdf [file pone.0149668.s007.pdf]

|                           |                                                        | <b>N Treatment</b> |           |           |            |
|---------------------------|--------------------------------------------------------|--------------------|-----------|-----------|------------|
|                           |                                                        | <b>N1</b>          | <b>N4</b> | <b>N7</b> | <b>N10</b> |
| <b>Macroelements (mM)</b> | <b>KH<sub>2</sub>PO<sub>4</sub></b>                    | 1,0                | 1,0       | 1,0       | 1,0        |
|                           | <b>KNO<sub>3</sub></b>                                 | 0,0                | 3,0       | 4,0       | 5,0        |
|                           | <b>Ca(NO<sub>3</sub>)<sub>2</sub>, 4H<sub>2</sub>O</b> | 0,5                | 0,5       | 1,5       | 2,5        |
|                           | <b>MgSO<sub>4</sub>, 7H<sub>2</sub>O</b>               | 2,0                | 2,0       | 2,0       | 2,0        |
|                           | <b>CaCl<sub>2</sub>, 2HO</b>                           | 3,0                | 3,0       | 3,0       | 2,0        |
|                           | <b>KCl</b>                                             | 5,0                | 2,0       | 1,0       | 0,0        |
| <b>Microelements (μM)</b> | <b>H<sub>3</sub>BO<sub>3</sub></b>                     | 10,0               | 10,0      | 10,0      | 10,0       |
|                           | <b>ZnCl<sub>2</sub></b>                                | 0,7                | 0,7       | 0,7       | 0,7        |
|                           | <b>CuCl<sub>2</sub>, 2H<sub>2</sub>O</b>               | 0,4                | 0,4       | 0,4       | 0,4        |
|                           | <b>MnCl<sub>2</sub>, 4H<sub>2</sub>O</b>               | 4,5                | 4,5       | 4,5       | 4,5        |
|                           | <b>MoO<sub>3</sub></b>                                 | 0,2                | 0,2       | 0,2       | 0,2        |
|                           | <b>EDFS-Fe</b>                                         | 50,0               | 50,0      | 50,0      | 50,0       |
